# Supplementary material
Source: Springer Nature journal article supplement (https://www.springermedizin.de/resource/supplementary/12889_2014_7399_MOESM3_ESM.pdf/9497330)

■ Low/Intermediate AUSDRISK (AUS) or Normal RBGT    ■ High risk

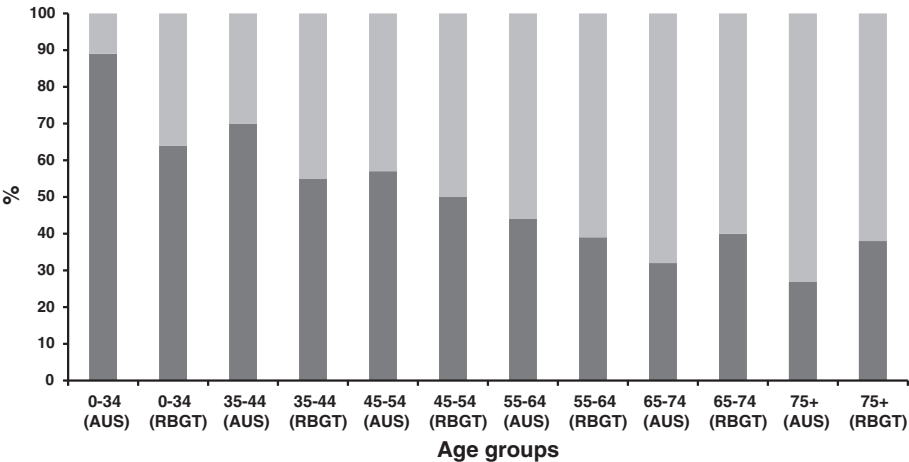

Supplement: MOESM3 [file 9497330]
